# Supplementary material
Source: publisher figshare collection journal article supplement (https://plos.figshare.com/articles/dataset/_/4489574)
Supplement: Supplementary file 1 [file 1]

Archive with 4 entries (4 files):
- S1 File.pdf
- S2 File.pdf
- S3 File.pdf
- S4 File.pdf
