# Supplementary material
Source: publisher figshare collection journal article supplement (https://plos.figshare.com/articles/dataset/_/4489574)
Supplement: Supplementary file 1 [file 1 › S1 File.pdf]

## S1 File. Database search.

### Database search overview

| Database          | Date of search | Time frame/update status        | Hits |
|-------------------|----------------|---------------------------------|------|
| Embase (OvidSP)   | 10.7.2015      | 1980 until 2015 Week 27         | 1928 |
| Medline (OvidSP)  | 10.7.2015      | 1946 until June Week 4 2015     | 661  |
| PsycINFO (OvidSP) | 10.7.2015      | 1806 until June Week 5 2015     | 235  |
| CINAHL            | 10.7.2015      |                                 | 232  |
| Cochrane Library  | 10.7.2015      |                                 | 435  |
|                   |                | <b>Total with duplicates</b>    | 3491 |
|                   |                | <b>Total without duplicates</b> | 2467 |

### EMBASE via OVID on 10<sup>th</sup> July 2015

| Nr. | Search terms                                                                                  | Hits    |
|-----|-----------------------------------------------------------------------------------------------|---------|
| 1   | exp smoking cessation/ or exp smoking cessation program/ or exp nicotine replacement therapy/ | 42929   |
| 2   | ((smoking or nicotine or tobacco) and (stop\$ or cessation or quit\$ or anti)).mp.            | 66777   |
| 3   | exp counseling/ or exp patient referral/                                                      | 181384  |
| 4   | (ask or advi?e or assess or assist\$ or arrange or refer\$ or consult or recommend).mp.       | 2623235 |
| 5   | exp general practice/ or exp general practitioner/ or exp primary medical care/               | 180782  |
| 6   | (family physician? or primary care physician? or general practitioner? or practitioner?).mp.  | 237029  |
| 7   | (family practice or family medicine).mp.                                                      | 19291   |
| 8   | 1 or 2                                                                                        | 67177   |
| 9   | 3 or 4                                                                                        | 2711250 |
| 10  | 5 or 6 or 7                                                                                   | 334621  |
| 11  | 8 and 9 and 10                                                                                | 2284    |
| 12  | limit 11 to yr="2000-2015"                                                                    | 1952    |
| 13  | remove duplicates from 12                                                                     | 1928    |

### Medline via OVID on 10<sup>th</sup> July 2015

| Nr. | Search terms                                                                                  | Hits  |
|-----|-----------------------------------------------------------------------------------------------|-------|
| 1   | exp smoking cessation/ or exp smoking cessation program/ or exp nicotine replacement therapy/ | 21856 |
| 2   | ((smoking or nicotine or tobacco) and (stop\$ or cessation or quit\$ or anti)).mp.            | 43852 |
| 3   | exp counseling/ or exp patient referral/                                                      | 34865 |

|    |                                                                                              |         |
|----|----------------------------------------------------------------------------------------------|---------|
| 4  | (ask or advise or assess or assist\$ or arrange or refer\$ or consult or recommend).mp.      | 1760712 |
| 5  | exp general practice/ or exp general practitioner/ or exp primary medical care/              | 67949   |
| 6  | (family physician? or primary care physician? or general practitioner? or practitioner?).mp. | 129887  |
| 7  | (family practice or family medicine).mp.                                                     | 65161   |
| 8  | 1 or 2                                                                                       | 43852   |
| 9  | 3 or 4                                                                                       | 1787364 |
| 10 | 5 or 6 or 7                                                                                  | 176981  |
| 11 | 8 and 9 and 10                                                                               | 953     |
| 12 | limit 11 to yr="2000-2015"                                                                   | 682     |
| 13 | remove duplicates from 12                                                                    | 661     |

#### PsycINFO via OVID on 10<sup>th</sup> July 2015

| Nr. | Search terms                                                                                  | Hits   |
|-----|-----------------------------------------------------------------------------------------------|--------|
| 1   | exp smoking cessation/ or exp smoking cessation program/ or exp nicotine replacement therapy/ | 10004  |
| 2   | ((smoking or nicotine or tobacco) and (stop\$ or cessation or quit\$ or anti)).mp.            | 15572  |
| 3   | exp counseling/ or exp patient referral/                                                      | 68797  |
| 4   | (ask or advise or assess or assist\$ or arrange or refer\$ or consult or recommend).mp.       | 456188 |
| 5   | exp general practice/ or exp general practitioner/ or exp primary medical care/               | 5011   |
| 6   | (family physician? or primary care physician? or general practitioner? or practitioner?).mp.  | 74320  |
| 7   | (family practice or family medicine).mp.                                                      | 3314   |
| 8   | 1 or 2                                                                                        | 15572  |
| 9   | 3 or 4                                                                                        | 513578 |
| 10  | 5 or 6 or 7                                                                                   | 76338  |
| 11  | 8 and 9 and 10                                                                                | 286    |
| 12  | limit 11 to yr="2000-2015"                                                                    | 235    |
| 13  | remove duplicates from 12                                                                     | 235    |

#### CINAHL on 10<sup>th</sup> July 2015

| Nr. | Search terms                                                                                           | Hits   |
|-----|--------------------------------------------------------------------------------------------------------|--------|
| 1   | (MH "Smoking Cessation") OR (MH "Smoking Cessation Programs") OR (MH "Tobacco Use Cessation Products") | 11769  |
| 2   | ((smoking or nicotine or tobacco) and (stop* or cessation or quit* or anti))                           | 15373  |
| 3   | (MH "Counseling+")                                                                                     | 17987  |
| 4   | (ask or advise or assess or assist* or arrange or refer* or consult or recommend)                      | 291209 |

|    |                            |        |
|----|----------------------------|--------|
| 5  | (MH "Primary Health Care") | 31256  |
| 6  | (MH "Physicians, Family")  | 8467   |
| 7  | (MH "Family Practice")     | 10773  |
| 8  | S1 OR S2                   | 15309  |
| 9  | S3 OR S4                   | 306000 |
| 10 | S5 OR S6 OR S7             | 45875  |
| 11 | S8 AND S9 AND S10          | 262    |
| 12 | limit 11 to yr="2000-2015" | 232    |

#### The Cochrane Library on 10<sup>th</sup> July 2015

| Nr. | Search terms                                                                                      | Hits   |
|-----|---------------------------------------------------------------------------------------------------|--------|
| 1   | MeSH descriptor: [Tobacco Use Cessation] explode all trees                                        | 2940   |
| 2   | ((("smoking" or "nicotine" or "tobacco") and ("stop*" or "cessation" or "quit*" or "anti"))       | 8473   |
| 3   | MeSH descriptor: [Counseling] explode all trees                                                   | 3455   |
| 4   | ("ask" or "advi?e" or "assess" or "assist*" or "arrange" or "refer*" or "consult" or "recommend") | 140903 |
| 5   | MeSH descriptor: [Physicians, Primary Care] explode all trees                                     | 71     |
| 6   | ("family physician?" or "primary care physician?" or "general practitioner?" or "practitioner?")  | 7282   |
| 7   | ("family practice" or "family medicine")                                                          | 4924   |
| 8   | #1 or #2                                                                                          | 8473   |
| 9   | #3 or #4                                                                                          | 143056 |
| 10  | #5 or #6 or #7                                                                                    | 10964  |
| 11  | #8 and #9 and #10 Publication year from 2000 to 2015                                              | 435    |
