# Supplementary material
Source: publisher figshare collection journal article supplement (https://plos.figshare.com/articles/dataset/_/4489574)
Supplement: Supplementary file 1 [file 1 › S3 File.pdf]

### S3 File. Full-text articles excluded by reason.

|            | Exclusion criteria                                                                                                                                            | Excluded full texts (n = 62) |
|------------|---------------------------------------------------------------------------------------------------------------------------------------------------------------|------------------------------|
| <b>A.</b>  | Study population are not primary care physicians (defined as general practitioners, family physicians or internists).                                         | 3                            |
| <b>B.</b>  | Study does not report on smoking cessation counseling delivered by primary care physicians to patients. Patients receiving the intervention are below age 18. | 0                            |
| <b>C.</b>  | Study does not report proportion of primary care physicians                                                                                                   | 0                            |
| <b>D.</b>  | Study does not report proportions of primary care physicians engaging in smoking cessation counseling.                                                        | 39                           |
| <b>E.1</b> | Measure is not a self-report questionnaire.                                                                                                                   | 5                            |
| <b>E.2</b> | Intervention study and no baseline data reported.                                                                                                             | 3                            |
| <b>E.3</b> | Not published in English or German language.                                                                                                                  | 11                           |
| <b>E.4</b> | Article is a dissertation.                                                                                                                                    | 0                            |
| <b>E.5</b> | Article is a conference proceeding.                                                                                                                           | 0                            |
| <b>E.6</b> | Article is a qualitative study.                                                                                                                               | 0                            |
| <b>E.7</b> | Article is an unpublished manuscript.                                                                                                                         | 0                            |
| <b>E.8</b> | Full text not available.                                                                                                                                      | 1                            |
