# Supplementary material
Source: publisher figshare collection journal article supplement (https://plos.figshare.com/articles/dataset/_/4489574)
Supplement: Supplementary file 1 [file 1 › S4 File.pdf]

## S4 File. Details of MMAT-Criteria.

| # | Criteria                                                                         | Studies and scores |         |         |         |         |         |         |         |         |         |         |         |         |         |         |         |         |         |         |         |         |         |         |         |         |         |         |         |         |         |         |         |         |         |         |         |        |
|---|----------------------------------------------------------------------------------|--------------------|---------|---------|---------|---------|---------|---------|---------|---------|---------|---------|---------|---------|---------|---------|---------|---------|---------|---------|---------|---------|---------|---------|---------|---------|---------|---------|---------|---------|---------|---------|---------|---------|---------|---------|---------|--------|
| A | Screening questions                                                              | 1                  | 2       | 3       | 4       | 5       | 6       | 7       | 8       | 9       | 10      | 11      | 12      | 13      | 14      | 15      | 16      | 17      | 18      | 19      | 20      | 21      | 22      | 23      | 24      | 25      | 26      | 27      | 28      | 29      | 30      | 31      | 32      | 33      | 34      | 35      |         |        |
| 1 | Clear qualitative/quantitative research or mixed method question?                | ✓<br>*             | ✓<br>*  | ✓<br>*  | ✓<br>*  | ✓<br>*  | ✓<br>*  | ✓<br>*  | ✓<br>*  | ✓<br>*  | ✓<br>*  | ✓<br>*  | ✓<br>*  | ✓<br>*  | ✓<br>*  | ✓<br>*  | ✓<br>*  | ✓<br>*  | ✓<br>*  | ✓<br>*  | ✓<br>*  | ✓<br>*  | ✓<br>*  | ✓<br>*  | ✓<br>*  | ✓<br>*  | ✓<br>*  | ✓<br>*  | ✓<br>*  | ✓<br>*  | ✓<br>*  | ✓<br>*  | ✓<br>*  | ✓<br>*  | ✓<br>*  | ✓<br>*  | ✓<br>*  |        |
| 2 | Do the collected data allow addressing the research question?                    | ✓<br>*             | ✓<br>*  | ✓<br>*  | ✓<br>*  | ✓<br>*  | ✓<br>*  | ✓<br>*  | ✓<br>*  | ✓<br>*  | ✓<br>*  | ✓<br>*  | ✓<br>*  | ✓<br>*  | ✓<br>*  | ✓<br>*  | ✓<br>*  | ✓<br>*  | ✓<br>*  | ✓<br>*  | ✓<br>*  | ✓<br>*  | ✓<br>*  | ✓<br>*  | ✓<br>*  | ✓<br>*  | ✓<br>*  | ✓<br>*  | ✓<br>*  | ✓<br>*  | ✓<br>*  | ✓<br>*  | ✓<br>*  | ✓<br>*  | ✓<br>*  | ✓<br>*  | ✓<br>*  |        |
| C | Quantitative descriptive                                                         | 1                  | 2       | 3       | 4       | 5       | 6       | 7       | 8       | 9       | 10      | 11      | 12      | 13      | 14      | 15      | 16      | 17      | 18      | 19      | 20      | 21      | 22      | 23      | 24      | 25      | 26      | 27      | 28      | 29      | 30      | 31      | 32      | 33      | 34      | 35      |         |        |
| 1 | Is the sampling strategy relevant to address the quantitative research question? | ✓<br>*             | ✓<br>*  | ✓<br>*  | ✓<br>*  | ✓<br>*  | ✓<br>*  | ✓<br>*  | ✓<br>*  | ✓<br>*  | ✓<br>*  | ✓<br>*  | ✓<br>*  | ✓<br>*  | ✓<br>*  | ✓<br>*  | ✓<br>*  | ✓<br>*  | ✓<br>*  | ✓<br>*  | ✓<br>*  | ✓<br>*  | ✓<br>*  | ✓<br>*  | ✓<br>*  | ✓<br>*  | ✓<br>*  | ✓<br>*  | ✓<br>*  | ✓<br>*  | ✓<br>*  | ✓<br>*  | ✓<br>*  | ✓<br>*  | ✓<br>*  | ✓<br>*  | ✓<br>*  | ✓<br>* |
| 2 | Is the sample representative of the population understudy?                       | ✓<br>*             | ✓<br>*  | ✓<br>*  | ✓<br>*  | ✓<br>*  | ✓<br>*  | ✓<br>*  | ✓<br>*  | ✓<br>*  | ✓<br>*  | ✓<br>*  | ✓<br>*  | ✓<br>*  | ✓<br>*  | ✓<br>*  | ✓<br>*  | ✓<br>*  | ✓<br>*  | ✓<br>*  | ✓<br>*  | ✓<br>*  | ✓<br>*  | ✓<br>*  | ✓<br>*  | ✓<br>*  | ✓<br>*  | ✓<br>*  | ✓<br>*  | ✓<br>*  | ✓<br>*  | ✓<br>*  | ✓<br>*  | ✓<br>*  | ✓<br>*  | ✓<br>*  | ✓<br>*  | ✓<br>* |
| 3 | Are measurements appropriate?                                                    | ✓<br>*             | ✓<br>*  | ✓<br>*  | ✓<br>*  | X       | ✓<br>*  | X       | ✓<br>*  | X       | ✓<br>*  | ✓<br>*  | ✓<br>*  | ✓<br>*  | ✓<br>* |
| 4 | Is there an acceptable response rate (60% or above)?                             | ✓<br>*             | ✓<br>*  | ✓<br>*  | ✓<br>*  | X       | ✓<br>*  | X       | ✓<br>*  | ✓<br>*  | X       | ✓<br>* |
| E | Total score                                                                      | **<br>*            | **<br>* | **<br>* | **<br>* | **<br>* | **<br>* | **<br>* | **<br>* | **<br>* | **<br>* | **<br>* | **<br>* | **<br>* | **<br>* | **<br>* | **<br>* | **<br>* | **<br>* | **<br>* | **<br>* | **<br>* | **<br>* | **<br>* | **<br>* | **<br>* | **<br>* | **<br>* | **<br>* | **<br>* | **<br>* | **<br>* | **<br>* | **<br>* | **<br>* | **<br>* | **<br>* |        |

1[19], 2[20], 3[21], 4[22], 5[17], 6[23], 7[24], 8[25], 9[26], 10[27], 11[28], 12[29], 13[30], 14[31], 15[32], 16[33], 17[34], 18[35], 19[32], 20[37], 21[38], 22[39], 23[40], 24[41], 25[42], 26[43], 27[44], 28[45], 29[46], 30[47], 31[48], 32[49], 33[7], 34[50], 35[51] x MMAT criteria not described; ✓ MMAT criteria described / = Met 0% of MMAT criteria; \* Met 25% of MMAT criteria; \*\* Met 50% of MMAT criteria; \*\*\* Met 75% of MMAT criteria; \*\*\*\* Met 100% of MMAT criteria
